# Supplementary material for: Tridentate complexes of 2,6-bis(4-substituted-1,2,3-triazol-1-ylmethyl)pyridine and its organic azide precursors: an application of the copper(ii) acetate-accelerated azide–alkyne cycloaddition
Source: Royal Society of Chemistry journal article supplement (doi:10.1039/c0dt01702g), 2011-01-01
Supplement: c0dt01702g.pdf [file c0dt01702g.pdf]

## Tridentate Complexes of 2,6-Bis(4-substituted-1,2,3-triazol-1-ylmethyl)pyridine and its Organic Azide Precursors – an Application of the Copper(II) Acetate-Accelerated Azide-Alkyne Cycloaddition

Wendy S. Brotherton, Pampa Guha, Hoa Phan, Ronald J. Clark, Michael Shatruk, and Lei Zhu\*

Department of Chemistry and Biochemistry, Florida State University, 95 Chieftan Way,  
Tallahassee, FL 32306-4390, USA

### Supporting Information

### Powder diffraction pattern of $\text{Cu}(\text{OAc})_2 \cdot \text{H}_2\text{O}$ used in this work.

Powder X-ray diffraction was performed on a Rigaku DMAX 300 Ultima III diffractometer (CuK $\alpha$  radiation,  $\lambda = 1.54185 \text{ \AA}$ ). Theoretical powder diffraction patterns were calculated with CrystalDiffract software.

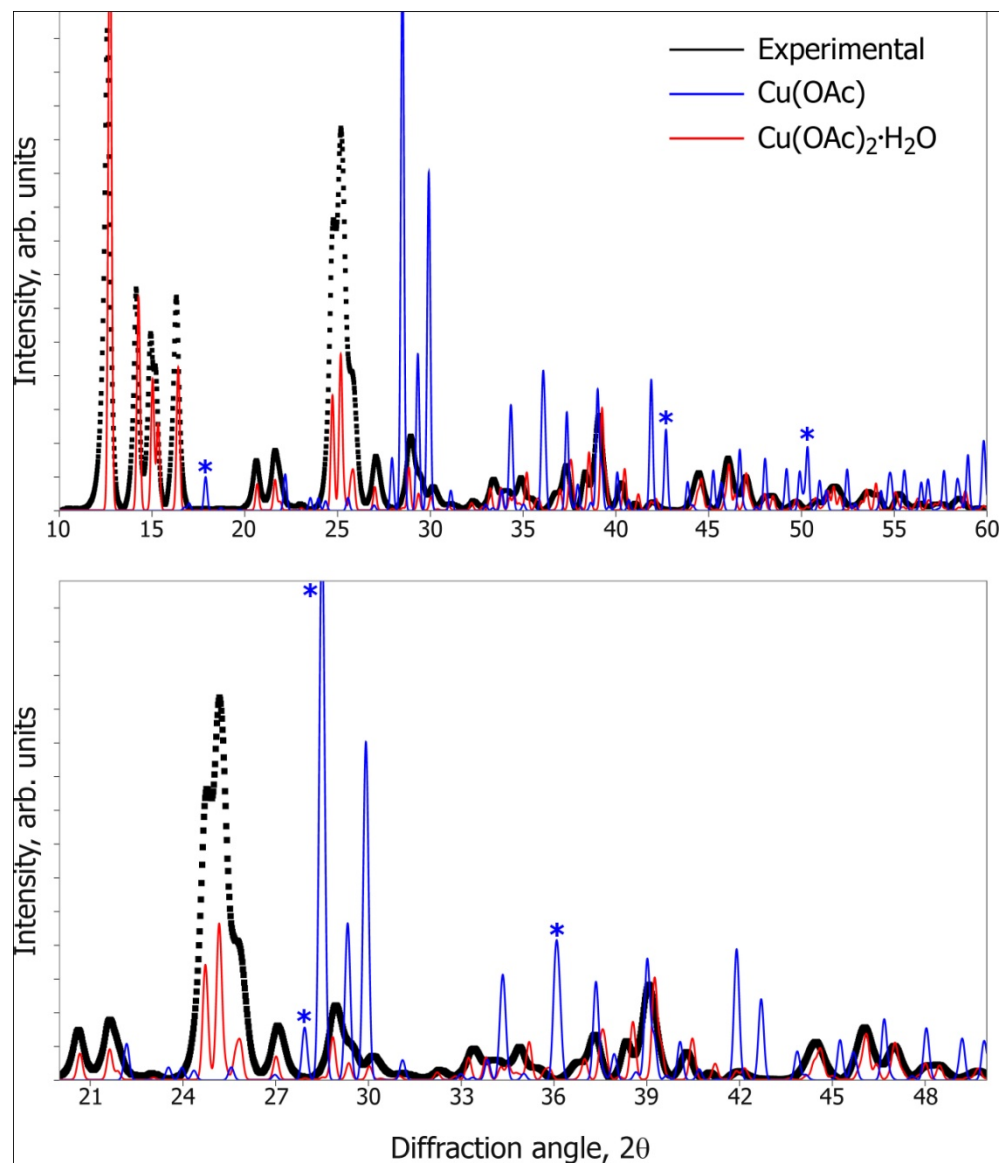

**Figure S1.** A comparison of an experimental powder pattern of the starting material,  $\text{Cu}(\text{OAc})_2 \cdot \text{H}_2\text{O}$ , to the theoretically calculated patterns of  $\text{Cu}(\text{OAc})_2 \cdot \text{H}_2\text{O}$  and  $\text{Cu}(\text{OAc})$ . The range of diffraction angles from 21 to 49 deg is additionally magnified. The most prominent reflections in the calculated  $\text{Cu}(\text{OAc})$  pattern that do not overlap with those in the calculated  $\text{Cu}(\text{OAc})_2 \cdot \text{H}_2\text{O}$  pattern are labeled with asterisks. The absence of these reflections in the experimental pattern is clearly seen and confirms the absence of  $\text{Cu}(\text{OAc})$  in the starting material.
